# Supplementary material
Source: PubMed Central journal article supplement (PMC4924618)
Supplement: NIHMS795996-supplement-Supplemental_Data.pdf [file NIHMS795996-supplement-Supplemental_Data.pdf]

**A**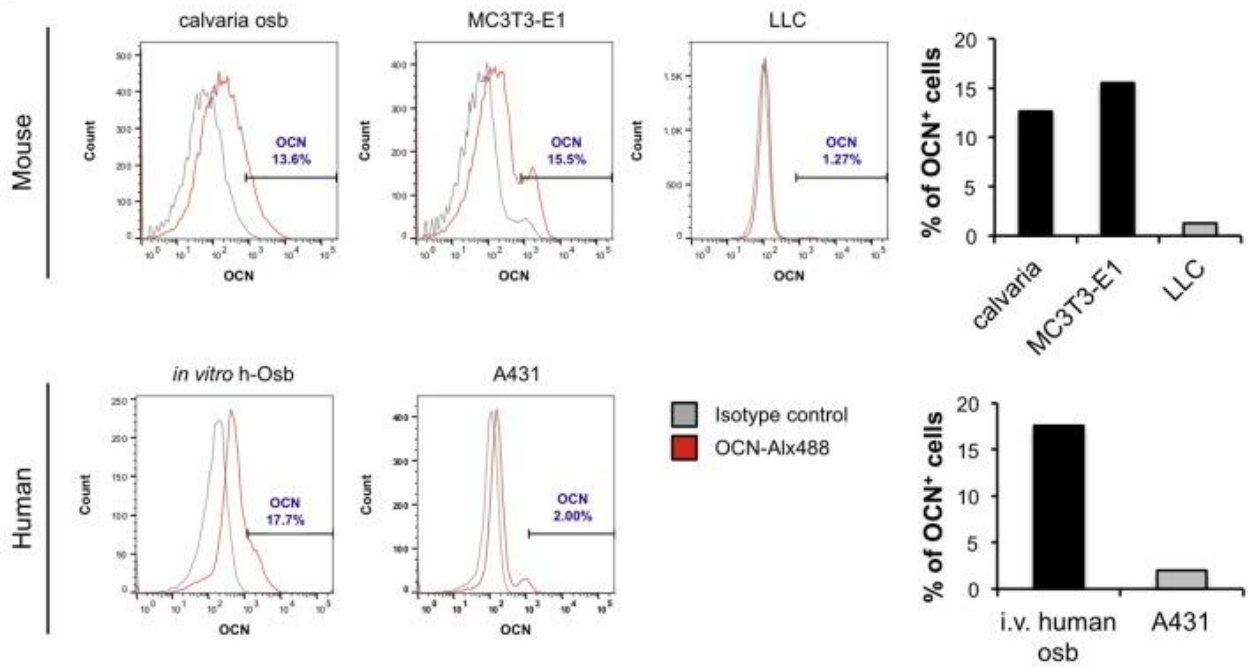**B**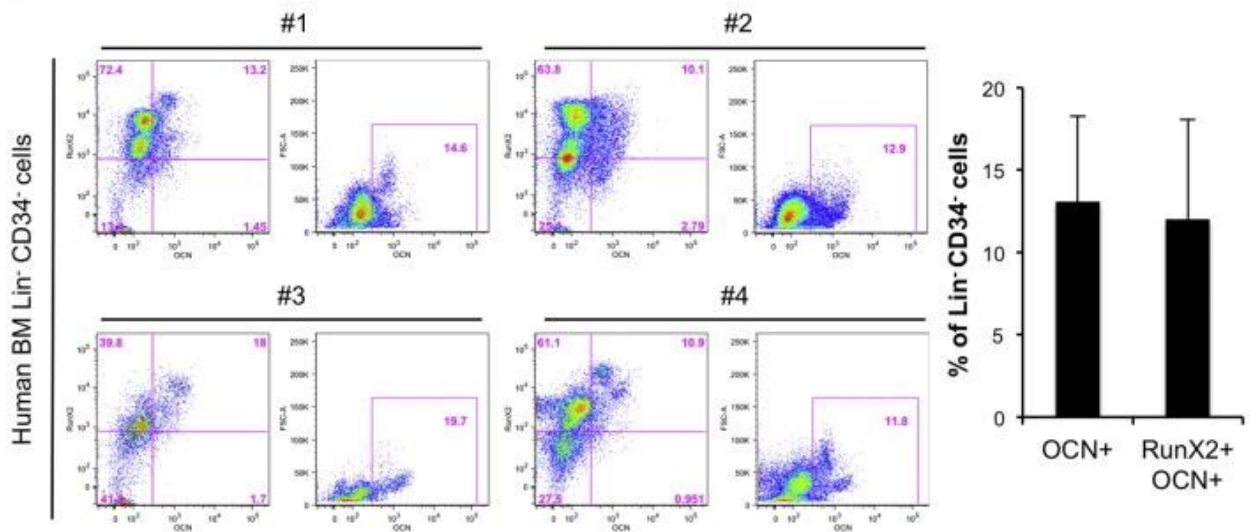

Supplemental Fig. 1. *Specificity of osteocalcin surface staining.* A) Flow cytometry analysis of mouse calvaria-derived osteoblasts, MC3T3-E1 osteoblastic cells, and Lewis lung carcinoma (LLC) cells (top row); and human osteoblasts derived from bone chip biopsies and the A-431 epithelial cell line (bottom row). Right graphs show the quantification of the percentage of osteocalcin (OCN) positive cells. B) Representative flow images of four bone marrow (BM) samples obtained from MDS patients, gated on the Lin<sup>-</sup> CD34<sup>-</sup> population, showing the double staining with the osteoblastic markers RunX2 and OCN (left dot plot for each sample) versus the OCN-positive cells (right dot plot). The graph on the right shows the percentage of Lin<sup>-</sup> CD34<sup>-</sup> human BM cells that are positive for either OCN only or OCN and RunX2 (n = 58 BM human samples).

Marta Galán-Díez, Adiba Isa, Marco Ponzetti, Morten Frost Nielsen, Moustapha Kassem, Stavroula Kousteni

**Normal hematopoiesis and lack of  $\beta$ -catenin activation in osteoblasts of patients and mice harboring *Lrp5* gain-of-function mutations** ☆☆☆

Biochimica et Biophysica Acta (BBA) - Molecular Cell Research, Volume 1863, Issue 3, 2016, 490–498

<http://dx.doi.org/10.1016/j.bbamcr.2015.11.037>
